# Supplementary material for: Quality of orthodontic care—A multicenter cohort study in a German convenience sample
Source: Springer Nature journal article supplement (doi:10.1007/s00056-024-00528-z), 2024-04-26
Supplement: MOESM1 [file 27021806]

**Sehr geehrte Damen und Herren,**

**die Poliklinik für Kieferorthopädie der Uniklinik Köln führt gemeinsam mit verschiedenen Standorten in Deutschland eine multizentrische Untersuchung hinsichtlich der Zahngesundheit und der Behandlungsqualität von kieferorthopädischen Behandlungen durch.**

**Ihre Mitarbeit ist freiwillig. Die wissenschaftliche Aussagekraft der Untersuchung hängt aber entscheidend von der Mitarbeit aller ausgewählten Personen ab.**

**Bitte beantworten Sie daher diesen Fragebogen sorgfältig und eigenständig. Wenn Sie Fragen haben, können Sie sich jederzeit an unsere(n) Mitarbeiter/in wenden.**

**Vielen Dank für Ihre Mitarbeit!**

**Probanden Nr:** Standortkürzel (K/Gie/BadE/Pu/Es/Aa/Ber)/ Modell-Nr (xxxx/xx) / „A“ oder „E“

### **Fragen für Probanden, die $\geq 16$ Jahre alt sind**

1. Wenn Sie an Ihre Zähne denken, wie ist der Zustand Ihrer Zähne?

- Sehr gut
- Gut
- Zufriedenstellend
- Weniger Gut
- Schlecht

2. Wie viel kann man selbst tun, um die Gesundheit seiner Zähne zu erhalten oder zu verbessern?

- Sehr Viel
- Viel
- Einiges
- Wenig
- Nichts

3. Wie oft putzen Sie sich gewöhnlich die Zähne?

- 3-mal täglich und häufiger
- Normalerweise 2-mal täglich
- Normalerweise 1-mal täglich
- Mehrmals die Woche
- 1-mal die Woche
- Seltener als 1-mal die Woche
- Eigentlich nie

4. Wann putzen Sie gewöhnlich die Zähne? (Sie können auch mehreres ankreuzen!)

- Nach dem Aufstehen, **vor** dem Frühstück
- Nach** dem Frühstück
- Nach** dem Mittagessen
- Nach** dem Abendessen
- Nach** Zwischenmahlzeiten
- Bevor** ich ins Bett gehe
- Verschieden-** wenn ich gerade daran denke

5. Wie lange putzen Sie sich die Zähne? (Bitte versuchen Sie, in Minuten oder Sekunden zu schätzen!)

- Ca. 30 Sekunden
- Ca. 1 Minute
- Ca. 1 ½ Minuten
- Ca. 2 Minuten
- Ca. 3 Minuten
- Länger als 3 Minuten

6. Welche Mittel benutzen Sie zur Mundpflege? (Sie können auch mehreres ankreuzen!)

- Zahnbürste
- Elektrische Zahnbürste
- Zahnpasta
- Zahnseide
- Zahnhölzer, -stocher, -stäbchen
- Zahnzwischenraumbürstchen
- Munddusche
- Mundwasser, Mundspüllösung
- Zuckerfreie Kaugummis
- Sonstige Pflegemittel
- Keine Pflegemittel

7. Ist bei Ihnen jemals vom Zahnarzt eine Behandlung des Zahnfleisches (Parodontitis-Behandlung) durchgeführt worden?

- Ja
- Nein

8. Gehen Sie zum Allgemeinzahnarzt (gemeint ist nicht der Kieferorthopäde) nur, wenn Sie Schmerzen oder Beschwerden haben, oder gehen Sie manchmal auch zur Kontrolle?

- Ich gehe **regelmäßig** zur Kontrolle
- Ich gehe auch **manchmal** zur Kontrolle
- Ich gehe **nur**, wenn ich Schmerzen / Beschwerden habe
- Ich gehe **nicht** zum Zahnarzt

9. Haben Sie einen Zahnarzt, den Sie als Ihren Zahnarzt bezeichnen würden?

- Ich bin seit Jahren bei demselben Zahnarzt in Behandlung
- Ich habe keinen festen Zahnarzt, ich wechsele öfter den Zahnarzt
- Ich habe im Moment keinen Zahnarzt
- Ich war noch nie beim Zahnarzt

10. Warum haben Sie sich entschieden, eine kieferorthopädische Behandlung durchführen zu lassen?

- Beschwerden beim Kauen
- Probleme mit dem Kiefergelenk
- Ästhetische Gründe
- Auf Rat eines Bekannten / Verwandten

11. Rauchen Sie zur Zeit Zigaretten? Wenn ja, wie viele und seit wann?

- Ja, \_\_\_ Zigarette (n) am Tag seit \_\_\_ Jahren
- Nein

**Hatten Sie in den vergangenen Wochen aufgrund von Problemen mit Ihren Zähnen und der kieferorthopädischen Behandlung....**

|                                                             | sehr<br>oft              | oft                      | ab<br>und<br>zu          | kaum                     | nie                      |
|-------------------------------------------------------------|--------------------------|--------------------------|--------------------------|--------------------------|--------------------------|
| 12. ....Schwierigkeiten beim Kauen von Nahrungsmitteln?     | <input type="checkbox"/> | <input type="checkbox"/> | <input type="checkbox"/> | <input type="checkbox"/> | <input type="checkbox"/> |
| 13. ....Schwierigkeiten, bestimmte Worte auszusprechen?     | <input type="checkbox"/> | <input type="checkbox"/> | <input type="checkbox"/> | <input type="checkbox"/> | <input type="checkbox"/> |
| 14. ....das Gefühl, dass ein Zahn nicht gesund aussieht?    | <input type="checkbox"/> | <input type="checkbox"/> | <input type="checkbox"/> | <input type="checkbox"/> | <input type="checkbox"/> |
| 15. ....das Gefühl, dass Ihr Aussehen beeinträchtigt wurde? | <input type="checkbox"/> | <input type="checkbox"/> | <input type="checkbox"/> | <input type="checkbox"/> | <input type="checkbox"/> |
| 16. ....das Gefühl, Sie hätten Mundgeruch?                  | <input type="checkbox"/> | <input type="checkbox"/> | <input type="checkbox"/> | <input type="checkbox"/> | <input type="checkbox"/> |
| 17. ....das Gefühl, Ihr Geschmackssinn war beeinträchtigt?  | <input type="checkbox"/> | <input type="checkbox"/> | <input type="checkbox"/> | <input type="checkbox"/> | <input type="checkbox"/> |
| 18. ....Speisereste zwischen Ihren Zähnen festgestellt?     | <input type="checkbox"/> | <input type="checkbox"/> | <input type="checkbox"/> | <input type="checkbox"/> | <input type="checkbox"/> |
| 19. ....das Gefühl, Ihre Verdauung war gestört?             | <input type="checkbox"/> | <input type="checkbox"/> | <input type="checkbox"/> | <input type="checkbox"/> | <input type="checkbox"/> |
| 20.....das Gefühl, dass Ihr Zahnersatz                      |                          |                          |                          |                          |                          |

schlecht sitzt?

**Hatten Sie in den vergangenen Wochen ....**

- |                                                                                                                                                  | sehr<br>oft              | oft                      | ab<br>und<br>zu          | kaum                     | nie                      |
|--------------------------------------------------------------------------------------------------------------------------------------------------|--------------------------|--------------------------|--------------------------|--------------------------|--------------------------|
| 21. ....Schmerzen im Mundbereich?                                                                                                                | <input type="checkbox"/> | <input type="checkbox"/> | <input type="checkbox"/> | <input type="checkbox"/> | <input type="checkbox"/> |
| 22. ....einen wunden, entzündeten Kiefer<br>bzw. Mund?                                                                                           | <input type="checkbox"/> | <input type="checkbox"/> | <input type="checkbox"/> | <input type="checkbox"/> | <input type="checkbox"/> |
| 23. ....Kopfschmerzen aufgrund von Problemen mit Ihren Zähnen, Mund-<br>Bereich oder in Zusammenhang mit<br>der kieferorthopädischen Behandlung? | <input type="checkbox"/> | <input type="checkbox"/> | <input type="checkbox"/> | <input type="checkbox"/> | <input type="checkbox"/> |
| 24. ....empfindliche Zähne, z.B. bei<br>heißen/kalten Speisen bzw. Getränken?                                                                    | <input type="checkbox"/> | <input type="checkbox"/> | <input type="checkbox"/> | <input type="checkbox"/> | <input type="checkbox"/> |
| 25. ....Zahnschmerzen?                                                                                                                           | <input type="checkbox"/> | <input type="checkbox"/> | <input type="checkbox"/> | <input type="checkbox"/> | <input type="checkbox"/> |
| 26. ....Schmerzen am Zahnfleisch?                                                                                                                | <input type="checkbox"/> | <input type="checkbox"/> | <input type="checkbox"/> | <input type="checkbox"/> | <input type="checkbox"/> |

**War es Ihnen in den vergangenen Wochen aufgrund von Problemen mit Ihren Zähnen  
und der kieferorthopädischen Behandlung, ....**

- |                                                            | sehr<br>oft              | oft                      | ab<br>und<br>zu          | kaum                     | nie                      |
|------------------------------------------------------------|--------------------------|--------------------------|--------------------------|--------------------------|--------------------------|
| 27. .... unangenehm, bestimmte<br>Nahrungsmittel zu essen? | <input type="checkbox"/> | <input type="checkbox"/> | <input type="checkbox"/> | <input type="checkbox"/> | <input type="checkbox"/> |

**Hatten Sie in den vergangenen Wochen ....**

- |                                                                            | sehr<br>oft              | oft                      | ab<br>und<br>zu          | kaum                     | nie                      |
|----------------------------------------------------------------------------|--------------------------|--------------------------|--------------------------|--------------------------|--------------------------|
| 28. ....wunde Stellen in Ihrem Mund?                                       | <input type="checkbox"/> | <input type="checkbox"/> | <input type="checkbox"/> | <input type="checkbox"/> | <input type="checkbox"/> |
| 29. <b>Hat ihr</b> Zahnersatz im vergangenen<br>Monat unangenehm gedrückt? | <input type="checkbox"/> | <input type="checkbox"/> | <input type="checkbox"/> | <input type="checkbox"/> | <input type="checkbox"/> |

**30. ....Haben Sie sich im vergangenen Monat**

Sorgen gemacht?

**Hatten Sie in den vergangenen Wochen ....**

sehr oft      oft      ab und zu      kaum      nie

31. ....ein Gefühl der Unsicherheit in Zusammenhang mit Ihren Zähnen bzw. Ihrem Mund?

32. ....das Gefühl, dass es Ihnen ganz schlecht geht aufgrund Ihrer Zähnen bzw. Ihrem Mund?

33. ....das Gefühl, dass Sie sich unbehaglich/unwohl wegen des Aussehens Ihrer Zähne gefühlt haben?

34. ....ein Gefühl, dass Sie angespannt waren aufgrund von Problemen mit Ihren Zähnen, im Mundbereich oder mit Ihrer kieferorthopädischen Behandlung?

**Ist es Ihnen in den vergangenen Wochen aufgrund von Problemen mit Ihren Zähnen und der kieferorthopädischen Behandlung vorgekommen, ....**

sehr oft      oft      ab und zu      kaum      nie

35. ....dass Sie nur undeutlich sprechen konnten?

36. ....dass andere Leute bestimmte Worte von Ihnen missverstanden haben?

37. ....dass Sie den Eindruck hatten, Ihr Essen war geschmacklich weniger gut?

38. ....dass Sie Ihre Zähne nicht richtig putzen konnten?

39. ....dass Sie auf bestimmte Speisen verzichtet haben?

40. ....dass Ihre Ernährung unbefriedigend  
gewesen ist?
41. ....dass Sie mit Ihrem Zahnersatz nicht  
essen konnten?
42. ....dass Sie das Lächeln vermieden haben?
43. ....dass Sie Mahlzeiten unterbrechen  
mussten?
44. ....dass Ihr Schlaf unterbrochen wurde?
45. ....dass Sie sehr verärgert waren?

**Hatten Sie in den vergangenen Wochen ....**

- |                                                                                                                           | sehr<br>oft              | oft                      | ab<br>und<br>zu          | kaum                     | nie                      |
|---------------------------------------------------------------------------------------------------------------------------|--------------------------|--------------------------|--------------------------|--------------------------|--------------------------|
| 46. ....Schwierigkeiten zu entspannen in Zusammenhang<br>mit Ihren Zähnen bzw. Ihrem Mund?                                | <input type="checkbox"/> | <input type="checkbox"/> | <input type="checkbox"/> | <input type="checkbox"/> | <input type="checkbox"/> |
| 47. ....das Gefühl, dass Sie bedrückt/depressiv waren<br>aufgrund von Problemen mit Ihren Zähnen<br>bzw. Ihrem Mund?      | <input type="checkbox"/> | <input type="checkbox"/> | <input type="checkbox"/> | <input type="checkbox"/> | <input type="checkbox"/> |
| 48. ....ein Gefühl sich schlechter konzentrieren<br>zu können aufgrund von Problemen mit Ihren Zähnen<br>bzw. Ihrem Mund? | <input type="checkbox"/> | <input type="checkbox"/> | <input type="checkbox"/> | <input type="checkbox"/> | <input type="checkbox"/> |
| 49. ....das Gefühl ein wenig verlegen zu sein<br>aufgrund von Problemen mit Ihren<br>Zähnen oder Ihrem Mund?              | <input type="checkbox"/> | <input type="checkbox"/> | <input type="checkbox"/> | <input type="checkbox"/> | <input type="checkbox"/> |

**Ist es Ihnen in den vergangenen Wochen aufgrund von Problemen mit Ihren Zähnen und  
der kieferorthopädischen Behandlung vorgekommen,....**

- | sehr<br>oft | oft | ab<br>und<br>zu | kaum | nie |
|-------------|-----|-----------------|------|-----|
|-------------|-----|-----------------|------|-----|

50. ....dass Sie es vermieden haben, außer Haus zu gehen aufgrund von Problemen mit Ihren Zähnen oder Ihrem Mund?

51. ....dass Sie weniger nachsichtig im Umgang mit Ihrem Ehepartner oder Ihrer Familie waren aufgrund von Problemen mit Ihren Zähnen oder Ihrem Mund?

52. ....allgemein Schwierigkeiten zu haben, mit anderen Menschen zurechtzukommen aufgrund von Problemen mit Ihren Zähnen oder Ihrem Mund?

53. ....dass Sie eher reizbar anderen Menschen gegenüber waren aufgrund von Problemen mit Ihren Zähnen oder Ihrem Mund?

54. ....dass es Ihnen schwergefallen ist, Ihren alltäglichen Beschäftigungen aufgrund von Problemen mit Ihren Zähnen oder Ihrem Mund nachzugehen?

**Hatten Sie in den vergangenen Wochen ....**

sehr oft      oft      ab und zu      kaum      nie

55. ....den Eindruck, das sich Ihre Allgemeingesundheit verschlechtert hat aufgrund von Problemen mit Ihren Zähnen oder Ihrem Mund?

56. ....finanzielle Einbußen aufgrund von Problemen mit Ihren Zähnen oder Ihrem Mund?

57. ....das Gefühl, dass Sie die Gesellschaft anderer Menschen nicht so recht genießen konnten aufgrund von Problemen mit Ihren Zähnen oder Ihrem Mund?

58. ....das Gefühl, dass Ihr Leben ganz allgemein weniger zufriedenstellend war aufgrund von Problemen mit Ihren Zähnen oder Ihrem Mund?

59. ....das Gefühl vollkommen unfähig zu sein, um etwas zu tun aufgrund von Problemen mit Ihren Zähnen oder Ihrem Mund?

60. ....das Gefühl, dass Sie bei Ihrer Arbeit nicht so leistungsfähig waren aufgrund von Problemen mit Ihren Zähnen oder Ihrem Mund?

**Haben Sie in den vergangenen Wochen ....**

sehr oft      oft      ab und zu      kaum      nie

61. ....es vermieden, mit anderen Personen gemeinsam zu essen aufgrund von Problemen mit Ihren Zähnen oder Ihrem Mund?

62. ...das Gefühl gehabt, dass es länger gedauert hat eine Mahlzeit zu beenden aufgrund von Problemen mit Ihren Zähnen oder Ihrem Mund?

**Hatten Sie in den vergangenen Wochen ....**

sehr oft      oft      ab und zu      kaum      nie

63. ....ein störendes Geräusch im Kiefergelenk?

64. ....einen unangenehm trockenen Mund?

**Wann wurden Sie geboren?**

**Welches Geschlecht haben Sie?**

**Wie viel Kilogramm wiegen Sie ohne Bekleidung?**

**Und wie groß sind Sie ohne Schuhe?**

**Welchen Schulabschluss haben Sie?** (Volksschul-/Hauptschulabschluss/Mittlere Reife, Realschulabschluss/Abschluss 10. Klasse/Fachhochschulreife/Abitur/Anderen Schulabschluss/Noch keinen Schulabschluss, zur Zeit noch in Schule/Nichts davon, keinen



Schulabschluss)

**Welche der folgenden Aufgaben trifft auf Ihre derzeitige Situation zu?** (Zur Zeit nicht oder nicht mehr berufstätig/Teilzeit oder stundenweise berufstätig/Voll berufstätig/vorübergehende Freistellung (z.B. Elternzeit)/Vorzeitig in Rente, pensioniert/Arbeitslos gemeldet/Hausfrau-/Mann/in Ausbildung)

**Vielen Dank für die Beantwortung der Fragen!**
